# Supplementary material for: Patient engagement in hospital health service planning and improvement: a scoping review
Source: PubMed Central journal article supplement — BMJ Open. 2018 Jan 30;8(1):e018263. doi: 10.1136/bmjopen-2017-018263 (PMC5829665; doi:10.1136/bmjopen-2017-018263), 2018-01-30
Supplement: bmjopen-2017-018263supp001.pdf [file bmjopen-2017-018263supp001.pdf]

## Supplementary File 1. Search strategy

- 1 decision making, organizational/ (8026)
- 2 Hospital Planning/mt, og [Methods, Organization & Administration] (408)
- 3 Organizational Objectives/ (14564)
- 4 "organization and administration"/ (2122)
- 5 Patient Care Management/mt, og [Methods, Organization & Administration] (1282)
- 6 Health Services Administration/og [Organization & Administration] (58)
- 7 committee membership/ (556)
- 8 governing board/ (2770)
- 9 institutional management teams/ (1322)
- 10 planning techniques/ (6475)
- 11 organizational innovation/ (17755)
- 12 hospital administration/ (6663)
- 13 Health facility administration/ (1069)
- 14 Professional staff committees/ (1340)
- 15 Health Services Research/mt, og [Methods, Organization & Administration] (5493)
- 16 Program Evaluation/ (44928)
- 17 Quality Assurance, Health Care/mt, og [Methods, Organization & Administration] (10605)
- 18 Quality Improvement/og [Organization & Administration] (2072)
- 19 "Quality of Health Care"/og [Organization & Administration] (3110)
- 20 research/ or behavioral research/ or operations research/ or research design/ (106452)
- 21 Patient-Centered Care/mt, og [Methods, Organization & Administration] (5523)
- 22 Consumer Participation/ (9801)
- 23 Patient Participation/ (15899)
- 24 (patient? adj2 engag\*).tw,kw,ti,ab. (2567)
- 25 (patient? adj2 involv\*).tw,kw,ti,ab. (21062)
- 26 (patient? adj2 participat\*).tw,kw,ti,ab. (10823)
- 27 (famil? adj2 engage\*).tw,kw,ti,ab. (271)
- 28 (famil? adj2 involv\*).tw,kw,ti,ab. (3434)
- 29 (famil? adj2 participat\*).tw,kw,ti,ab. (1146)
- 30 (public? adj2 engag\*).tw,kw,ti,ab. (589)
- 31 (public? adj2 involv\*).tw,kw,ti,ab. (892)
- 32 (public? adj2 participat\*).tw,kw,ti,ab. (723)
- 33 (consumer? adj2 engag\*).tw,kw,ti,ab. (189)
- 34 (consumer? adj2 involv\*).tw,kw,ti,ab. (368)
- 35 (consumer? adj2 participat\*).tw,kw,ti,ab. (266)
- 36 (communit? adj2 engag\*).tw,kw,ti,ab. (1573)
- 37 (communit? adj2 involv\*).tw,kw,ti,ab. (2076)
- 38 (communit? adj2 participat\*).tw,kw,ti,ab. (4233)
- 39 (user adj2 engag\*).tw,kw,ti,ab. (110)
- 40 (user adj2 involv\*).tw,kw,ti,ab. (518)
- 41 (user adj2 participat\*).tw,kw,ti,ab. (167)
- 42 or/1-20 (216918)
- 43 or/21-41 (74443)
- 44 42 and 43 (7674)
- 45 limit 44 to (english language and yr="2006 -Current") (4434)
- 46 limit 45 to (case reports or clinical study or clinical trial, all or clinical trial, phase i or clinical trial, phase ii or clinical trial, phase iii or clinical trial, phase iv or clinical trial or comparative study or controlled clinical trial or pragmatic clinical trial or randomized controlled trial) (668)
- 47 limit 46 to (comment or editorial or interview or lectures or letter or news) (1)
- 48 46 or 47 (668)
- 49 45 not 48 (3766)
